# Supplementary material for: Activation of Pd-precatalysts by organic compounds for vinyl-addition polymerization of a norbornene derivative
Source: Royal Society of Chemistry journal article supplement (doi:10.1039/d1cc00546d), 2021-01-01
Supplement: d1cc00546d1.pdf [file d1cc00546d1.pdf]

## Electronic Supplementary Information

### Activation of Pd-precatalysts by organic compounds for vinyl-addition polymerization of norbornene derivatives

Gleb O. Karpov,<sup>a</sup> Xiang-Kui Ren,<sup>b</sup> Elizaveta K. Melnikova,<sup>c,d</sup> and Maxim V. Bermeshev<sup>a,\*</sup>

<sup>a</sup> A.V. Topchiev Institute of Petrochemical Synthesis RAS, 29, Leninskii prospect, Moscow, Russia, 119991

<sup>b</sup> School of Chemical Engineering and Technology, Tianjin University, Tianjin 300350, P. R. China

<sup>c</sup> A.N. Nesmeyanov Institute of Organoelement Compounds, Russian Academy of Sciences, Vavilov Street 28, Moscow, 119991, Russia

<sup>d</sup> M.V. Lomonosov Moscow State University, Department of Chemistry, 1, Leninskie Gory, Moscow, Russia, 119991

E-Mail: [bmv@ips.ac.ru](mailto:bmv@ips.ac.ru) (M.V. Bermeshev)

### Table of Contents

|                                                                                                                                                                                                                               |    |
|-------------------------------------------------------------------------------------------------------------------------------------------------------------------------------------------------------------------------------|----|
| 1. Materials                                                                                                                                                                                                                  | S2 |
| 2. Characterization of polymers                                                                                                                                                                                               | S2 |
| 3. General procedures for vinyl-addition polymerization                                                                                                                                                                       | S3 |
| 4. Synthesis of ( <i>p</i> -CF <sub>3</sub> C <sub>6</sub> H <sub>4</sub> )Pd(PPh <sub>3</sub> ) <sub>2</sub> I                                                                                                               | S4 |
| 5. Table S1 Vinyl-addition polymerization of norbornene over Pd(dba) <sub>2</sub> activated by various organic compounds                                                                                                      | S5 |
| 6. Figure S1. <sup>1</sup> H NMR spectrum of vinyl-addition polynorbornene                                                                                                                                                    | S6 |
| 7. Figure S2. The influence of monomer concentration on the polynorbornene yield                                                                                                                                              | S7 |
| 8. Figure S3. <sup>1</sup> H NMR spectrum of ( <i>p</i> -CF <sub>3</sub> C <sub>6</sub> H <sub>4</sub> )Pd(PPh <sub>3</sub> ) <sub>2</sub> I                                                                                  | S8 |
| 9. Table S2 The influence of Pd(dba) <sub>2</sub> /NO <sub>2</sub> C <sub>6</sub> H <sub>4</sub> N <sub>2</sub> <sup>+</sup> BF <sub>4</sub> <sup>-</sup> molar ratio on the yield and the molecular weight of polynorbornene | S8 |
| 10. Table S3 The influence of solvent nature on the polynorbornene yield                                                                                                                                                      | S9 |
| 11. Table S4 The influence of temperature on the polynorbornene yield                                                                                                                                                         | S9 |
| 12. Crystallographic data                                                                                                                                                                                                     | S9 |
| 13. References                                                                                                                                                                                                                | S9 |

## Materials

Commercial norbornene, 5-ethylidene-2-norbornene (ENB, mixture of *Z*- and *E*-isomers), 5-vinyl-2-norbornene (VNB, mixture of *endo*- and *exo*-isomers), 5-norbornene-2-methanol (mixture of *endo*- and *exo*-isomers), 5-norbornene-2-carboxylic acid (mixture of *endo*- and *exo*-isomers), phenyl bromide, phenyl iodide, *p*-NO<sub>2</sub>C<sub>6</sub>H<sub>4</sub>Br, *p*-NO<sub>2</sub>C<sub>6</sub>H<sub>4</sub>I, *p*-MeOC<sub>6</sub>H<sub>4</sub>I, *p*-CF<sub>3</sub>C<sub>6</sub>H<sub>4</sub>I, C<sub>6</sub>F<sub>5</sub>Cl, C<sub>6</sub>F<sub>5</sub>Br, methyl iodide, methylene iodide, benzoyl chloride, 3,5-bis(trifluoromethyl)phenylbromide, *p*-tolylboronic acid pinacol ester, tricyclohexylphosphine (PCy<sub>3</sub>), tri-*tert*-butylphosphine (P<sup>t</sup>Bu<sub>3</sub>), Pd(dba)<sub>2</sub>, Pd(OAc)<sub>2</sub>, Pd(acac)<sub>2</sub>, PdCl<sub>2</sub>, NaBF<sub>4</sub> and solvents from Sigma-Aldrich were used in this study. PhN<sub>2</sub><sup>+</sup>BF<sub>4</sub><sup>-</sup>,<sup>1</sup> PhN<sub>2</sub><sup>+</sup>OTf,<sup>2</sup> *p*-CF<sub>3</sub>C<sub>6</sub>H<sub>4</sub>N<sub>2</sub><sup>+</sup>BF<sub>4</sub><sup>-</sup>,<sup>1</sup> *p*-NC-C<sub>6</sub>H<sub>4</sub>N<sub>2</sub><sup>+</sup>BF<sub>4</sub><sup>-</sup>,<sup>1</sup> *p*-MeOC<sub>6</sub>H<sub>4</sub>N<sub>2</sub><sup>+</sup>BF<sub>4</sub><sup>-</sup>, *p*-NO<sub>2</sub>C<sub>6</sub>H<sub>4</sub>N<sub>2</sub><sup>+</sup>BF<sub>4</sub><sup>-</sup>,<sup>1</sup> PhOTf,<sup>3</sup> Pd<sub>2</sub>(dba)<sub>3</sub>·CHCl<sub>3</sub>,<sup>4</sup> Pd(PPh<sub>3</sub>)<sub>4</sub>,<sup>5</sup> SIPrPdPCy<sub>3</sub><sup>6</sup> were prepared according to published procedures. The monomers (5-*n*-hexyl-2-norbornene and 5-*n*-decyl-2-norbornene) were prepared as described in the literature.<sup>7</sup>

Chloroform was distilled over CaH<sub>2</sub> and it was kept in an inert atmosphere (dried argon) with CaH<sub>2</sub>. 1,2-Dichloroethane was dried over P<sub>2</sub>O<sub>5</sub> and distilled under argon. Toluene, ENB and VNB were distilled from sodium under argon before use. 5-Norbornene-2-methanol, 5-norbornene-2-carboxylic acid, Pd(dba)<sub>2</sub>, Pd(OAc)<sub>2</sub>, Pd(acac)<sub>2</sub>, PdCl<sub>2</sub>, NaBF<sub>4</sub>, *p*-MeOC<sub>6</sub>H<sub>4</sub>I, *p*-CF<sub>3</sub>C<sub>6</sub>H<sub>4</sub>I, *p*-MeOC<sub>6</sub>H<sub>4</sub>N<sub>2</sub><sup>+</sup>BF<sub>4</sub><sup>-</sup>, P<sup>t</sup>Bu<sub>3</sub>, PCy<sub>3</sub> and *p*-tolylboronic acid pinacol ester were used without additional purification. Phenyl bromide, phenyl iodide, C<sub>6</sub>F<sub>5</sub>Cl, C<sub>6</sub>F<sub>5</sub>Br, methyl iodide, methylene iodide, benzoyl chloride, 3,5-bis(trifluoromethyl)phenylbromide were purified *via* distillation under vacuum. *p*-NO<sub>2</sub>C<sub>6</sub>H<sub>4</sub>Br and *p*-NO<sub>2</sub>C<sub>6</sub>H<sub>4</sub>I were recrystallized from hot methanol.

All manipulations with air- and moisture-sensitive compounds were carried out under dried and purified argon using standard Schlenk and vacuum-line techniques. The monomers were stored in an inert atmosphere.

## Characterization of polymers

The NMR spectra were recorded on a Bruker Avance DRX 400 spectrometer at 400.1 MHz (<sup>1</sup>H NMR) and 100.6 MHz (<sup>13</sup>C NMR) in CDCl<sub>3</sub> solution. Chemical shifts δ are reported in parts per million (ppm) relative to reference (residual CHCl<sub>3</sub> signal). <sup>31</sup>P NMR spectra were obtained on a Bruker Avance DRX 400 (at 162 MHz) using H<sub>3</sub>PO<sub>4</sub> (85% solution in water) sealed in a thin tube as an external reference.

Gel-permeation chromatography (GPC) analysis of the polymers was performed on a Waters system with a differential refractometer (Chromatopack Microgel-5; eluent, chloroform; flow rate, 1ml/min). The molecular weights and polydispersity were calculated by a standard procedure relative to monodispersed polystyrene standards.

## ***General procedures for vinyl-addition polymerization***

### **Addition polymerization of norbornene**

$5.3 \cdot 10^{-3}$  M solution of catalyst was prepared by mixing Pd(dba)<sub>2</sub> (7.1 mg,  $1.2 \cdot 10^{-2}$  mmol) and *p*-NO<sub>2</sub>C<sub>6</sub>H<sub>4</sub>N<sub>2</sub><sup>+</sup>BF<sub>4</sub><sup>-</sup> (8.6 mg,  $3.6 \cdot 10^{-2}$  mmol) in 2.34 mL of chloroform in glass vial charged with magnetic stirrer an inert atmosphere. The mixture was allowed to stir for 5 min. 0.307 mL of 70.2 wt.% solution of norbornene in toluene (2.1 mmol) was mixed with 0.355 mL of chloroform in glass vial charged with magnetic stirrer. 0.4 mL of  $5.3 \cdot 10^{-3}$  M solution of catalyst was added with stirring in air media. The reaction mixture was allowed to stir for 15 minutes at 25°C and was then precipitated into ethanol. The ethanol was removed, then the polymer was washed with  $3 \times 3$  mL of ethanol and dried in vacuum. The polymer was reprecipitated twice from its chloroform solution into ethanol and dried in vacuum at 60 °C to a constant weight.

<sup>1</sup>H NMR (CDCl<sub>3</sub>, δ, ppm): 2.50-0.70 m (10H).

### **Vinyl-addition polymerization of 5-*n*-hexylnorbornene**

$3.2 \cdot 10^{-2}$  M solution of Pd(dba)<sub>2</sub> (2.6 mg,  $4 \cdot 10^{-3}$  mmol) and *p*-NO<sub>2</sub>C<sub>6</sub>H<sub>4</sub>N<sub>2</sub><sup>+</sup>BF<sub>4</sub><sup>-</sup> (3.2 mg,  $1.2 \cdot 10^{-4}$  mmol) in 0.14 ml of chloroform was prepared in glass vial charged with magnetic stirrer an inert atmosphere and stirred for 5 min. 5-*n*-Hexylnorbornene (0.20 g, 1.1 mmol) was then added in air media and the reaction mixture was stirred at 25°C. After 30 minutes the reaction mixture was precipitated into ethanol. The ethanol was removed, then the polymer was washed with  $3 \times 3$  mL of ethanol and dried in vacuum. The polymer was reprecipitated twice from its chloroform solution into ethanol and dried in vacuum at 60 °C to a constant weight.

<sup>1</sup>H NMR (CDCl<sub>3</sub>, δ, ppm): 2.70-0.40 m (22H).

### ***Vinyl-addition poly(5-*n*-decyl-2-norbornene)***

<sup>1</sup>H NMR (C<sub>6</sub>D<sub>6</sub>, δ, ppm): 2.55-0.45 m (30H).

### ***Vinyl-addition poly(5-ethylidene-2-norbornene)***

<sup>1</sup>H NMR (CDCl<sub>3</sub>, δ, ppm): 6.00-4.9 m (1H), 2.80-0.69 m (12H).

### ***Vinyl-addition poly(5-vinyl-2-norbornene)***

<sup>1</sup>H NMR (CDCl<sub>3</sub>, δ, ppm): 6.18-4.7 m (olefinic protons), 2.60-0.75 m (carbocyclic protons).

### ***Vinyl-addition polymerization of 5-norbornene-2-carboxylic acid***

$2.8 \cdot 10^{-2}$  M solution of  $\text{Pd}(\text{dba})_2$  (12 mg, 0.02 mmol) and  $p\text{-NO}_2\text{C}_6\text{H}_4\text{N}_2^+\text{BF}_4^-$  (16 mg, 0.06 mmol) in 0.75 mL of chloroform was prepared in glass vial charged with magnetic stirrer an inert atmosphere and stirred for 5 min. 5-Norbornene-2-carboxylic acid (0.20 g, 1.4 mmol) was dissolved in 0.1 mL of chloroform in glass vial charged with magnetic stirrer in air media. 0.2 mL of  $2.8 \cdot 10^{-2}$  M solution of catalyst was then added with stirring. After 24 hours reaction mixture was precipitated into hexane. The ethanol was removed, then the polymer was washed with  $3 \times 3$  mL of hexane and dried in vacuum. The polymer was reprecipitated twice from its THF solution into hexane and dried in vacuum at  $60^\circ\text{C}$  to a constant weight.  $^1\text{H}$  NMR spectrum of the polymer corresponded to the earlier published one.<sup>8</sup>

### ***Synthesis of $(p\text{-CF}_3\text{C}_6\text{H}_4)\text{Pd}(\text{PPh}_3)_2\text{I}$***

The reaction was carried out under argon atmosphere in a glove box.  $\text{Pd}(\text{PPh}_3)_4$  (0.10 g, 0.08 mmol, 1 eq.) was stirred in 2 mL of dry THF in a 4 ml glass vial. After 5 minutes,  $p\text{-CF}_3\text{C}_6\text{H}_4\text{I}$  (0.22 g, 0.8 mmol, 10 eq.) was added and the solution was stirred for 6 hours. The solvent was removed under reduced pressure. The residue was washed with  $2 \times 2$  ml of dry diethyl ether and  $2 \times 2$  ml of dry methanol to remove triphenylphosphine. After that, the product was dissolved in 0.3 ml of dry  $\text{CH}_2\text{Cl}_2$ . The solution was layered with 3 ml of dry methanol and was kept overnight at  $-20^\circ\text{C}$ . The desired complex crystallized as yellowish crystals and the solution was removed. Yield: 30 mg (45%).

$^1\text{H}$  NMR ( $\text{CDCl}_3$ ,  $\delta$ , ppm): 7.53-7.48 m (12 H), 7.34-7.22 m (18 H), 6.71 d (2H), 6.39 d (2H).

$^{31}\text{P}$  NMR ( $\text{CDCl}_3$ ,  $\delta$ , ppm): 23.59.

**Table S1** Vinyl-addition polymerization of norbornene over Pd(dba)<sub>2</sub> activated by various organic compounds.<sup>a</sup>

| Cocatalyst                                                                                          | NB/Pd molar ratio | Pd/Cocatalyst molar ratio | Yield, % | M <sub>w</sub> ×10 <sup>-3</sup> | M <sub>n</sub> ×10 <sup>-3</sup> | M <sub>w</sub> /M <sub>n</sub> <sup>b</sup> |
|-----------------------------------------------------------------------------------------------------|-------------------|---------------------------|----------|----------------------------------|----------------------------------|---------------------------------------------|
| CH <sub>3</sub> I                                                                                   | 100/1             | 1/5                       | 0        | -                                | -                                | -                                           |
| CH <sub>2</sub> I <sub>2</sub>                                                                      | 100/1             | 1/5                       | 0        | -                                | -                                | -                                           |
| 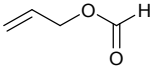                   | 100/1             | 1/5                       | 0        | -                                | -                                | -                                           |
|                    | 100/1             | 1/5                       | 0        | -                                | -                                | -                                           |
| C <sub>6</sub> F <sub>5</sub> Cl                                                                    | 100/1             | 1/5                       | 0        | -                                | -                                | -                                           |
| PhC(O)Cl                                                                                            | 100/1             | 1/5                       | 11       | -                                | -                                | -                                           |
| PhBr                                                                                                | 100/1             | 1/5                       | 1        | -                                | -                                | -                                           |
| C <sub>6</sub> F <sub>5</sub> Br                                                                    | 100/1             | 1/5                       | 5        | -                                | -                                | -                                           |
| C <sub>6</sub> F <sub>5</sub> Br/P <sup>t</sup> Bu <sub>3</sub>                                     | 100/1             | 1/3 <sup>c</sup>          | 20       | 5.1                              | 2.3                              | 2.2                                         |
| <i>p</i> -NO <sub>2</sub> C <sub>6</sub> H <sub>4</sub> Br                                          | 100/1             | 1/5                       | 11       | -                                | -                                | -                                           |
|                    | 100/1             | 1/50                      | 4        | -                                | -                                | -                                           |
|                                                                                                     | 100/1             | 1/5                       | 17       | -                                | -                                | -                                           |
|                                                                                                     | 100/1             | 1/5                       | 36       | 8.8                              | 4.9                              | 1.8                                         |
| PhI                                                                                                 | 250/1             | 1/5                       | 12       | 7.0                              | 3.5                              | 2.0                                         |
|                                                                                                     | 500/1             | 1/5                       | 3        | 4.5                              | 2.0                              | 2.2                                         |
|                                                                                                     | 100/1             | 1/3 <sup>d</sup>          | 4        | -                                | -                                | -                                           |
| <i>p</i> -MeOC <sub>6</sub> H <sub>4</sub> I                                                        | 300/1             | 1/3 <sup>d</sup>          | traces   | -                                | -                                | -                                           |
|                                                                                                     | 100/1             | 1/3 <sup>d</sup>          | 22       | 3.4                              | 1.4                              | 2.4                                         |
| <i>p</i> -CF <sub>3</sub> C <sub>6</sub> H <sub>4</sub> I                                           | 300/1             | 1/3 <sup>d</sup>          | 3        | 2.3                              | 1.1                              | 2.1                                         |
| PhOTf                                                                                               | 250/1             | 1/3 <sup>e</sup>          | 5        | -                                | -                                | -                                           |
| <i>p</i> -MeOC <sub>6</sub> H <sub>4</sub> N <sub>2</sub> <sup>+</sup> BF <sub>4</sub> <sup>-</sup> | 1000/1            | f                         | 0        | -                                | -                                | -                                           |

<sup>a</sup>The polymerization conditions: 25°C, 24 h, solvent – toluene, [NB] – 6.4 M, in argon. <sup>b</sup>Molecular weights and PDI were determined by GPC according to polystyrene standards. <sup>c</sup>Pd/P<sup>t</sup>Bu<sub>3</sub> molar ratio was 1/2. <sup>d</sup>[NB] – 3.5 M, the reaction time – 2 h. <sup>e</sup>[NB] – 2 M, the solvent – chloroform. <sup>f</sup>[NB] – 2.0 M, the reaction time – 2 h, the solvent – chloroform.

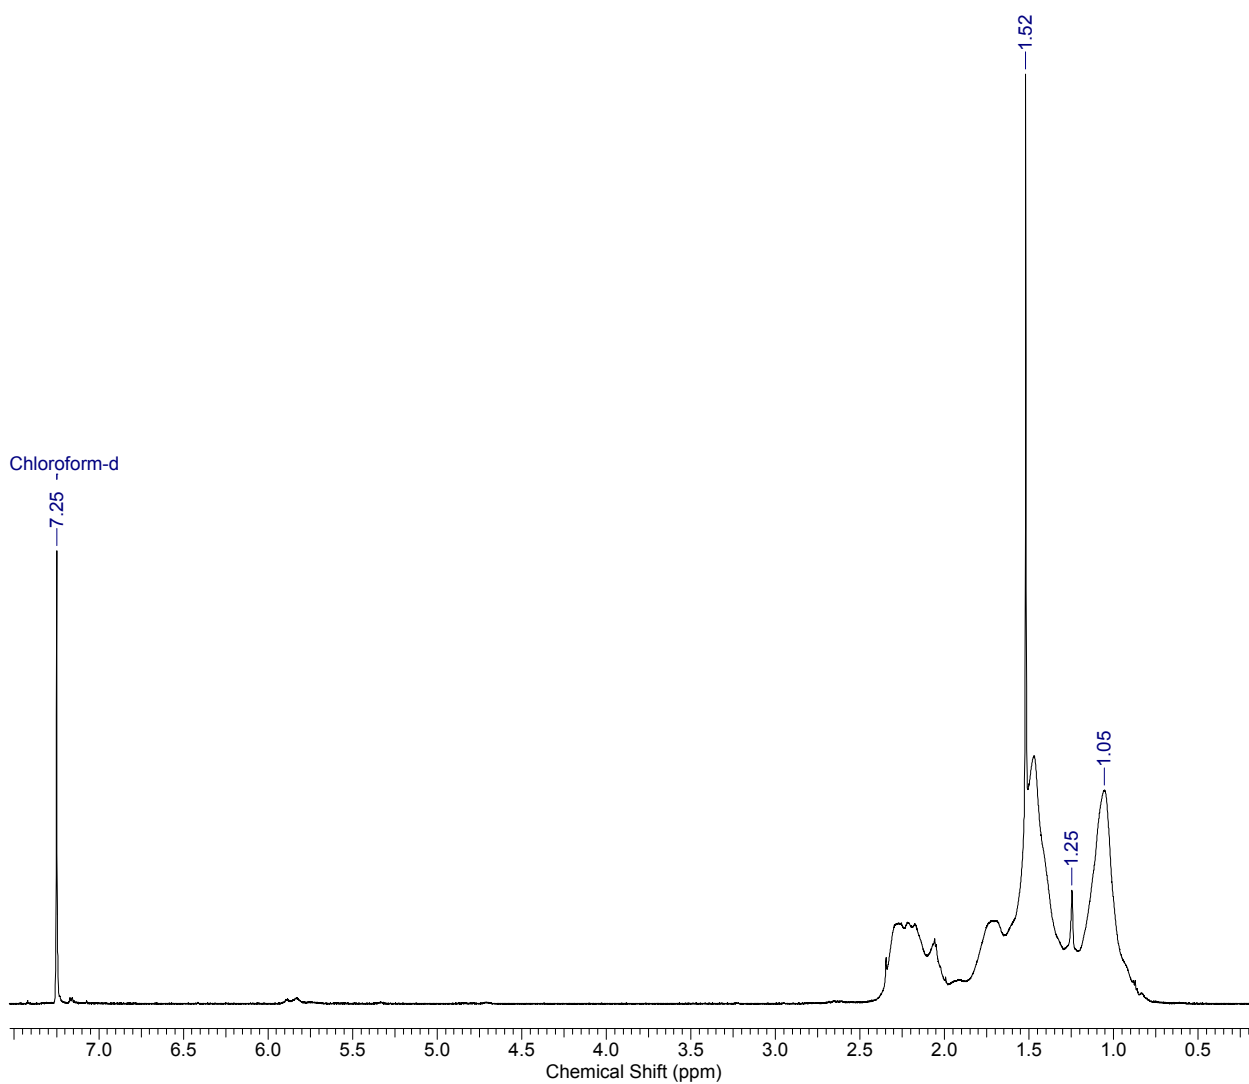

**Figure S1.**  $^1\text{H}$  NMR spectrum of vinyl-addition polynorbornene prepared using  $\text{Pd}(\text{dba})_2/p\text{-NO}_2\text{C}_6\text{H}_4\text{N}_2^+\text{BF}_4^-$  system ( $\text{CDCl}_3$ , molar ratio norbornene/ $\text{Pd}/p\text{-NO}_2\text{C}_6\text{H}_4\text{N}_2^+\text{BF}_4^- = 1000/1/3$ ,  $[\text{NB}] = 2.0 \text{ M}$ , reaction time – 25 minutes).

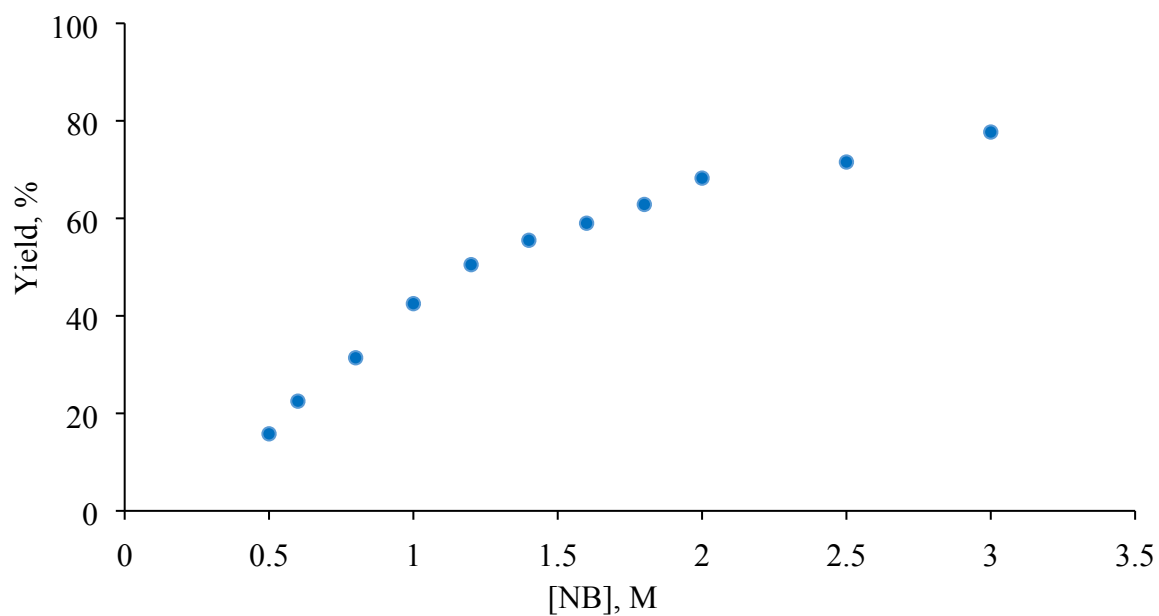

**Figure S2.** The influence of monomer concentration on the polynorbornene yield (catalyst –  $\text{Pd}(\text{dba})_2/p\text{-NO}_2\text{C}_6\text{H}_4\text{N}_2^+\text{BF}_4^-$ ; monomer/Pd molar ratio = 1000/1; molar ratio of  $\text{Pd}(\text{dba})_2/p\text{-NO}_2\text{C}_6\text{H}_4\text{N}_2^+\text{BF}_4^- = 1/3$ ; the solvent – chloroform; the reaction time – 15 min, the reaction temperature – 25°C, in air).

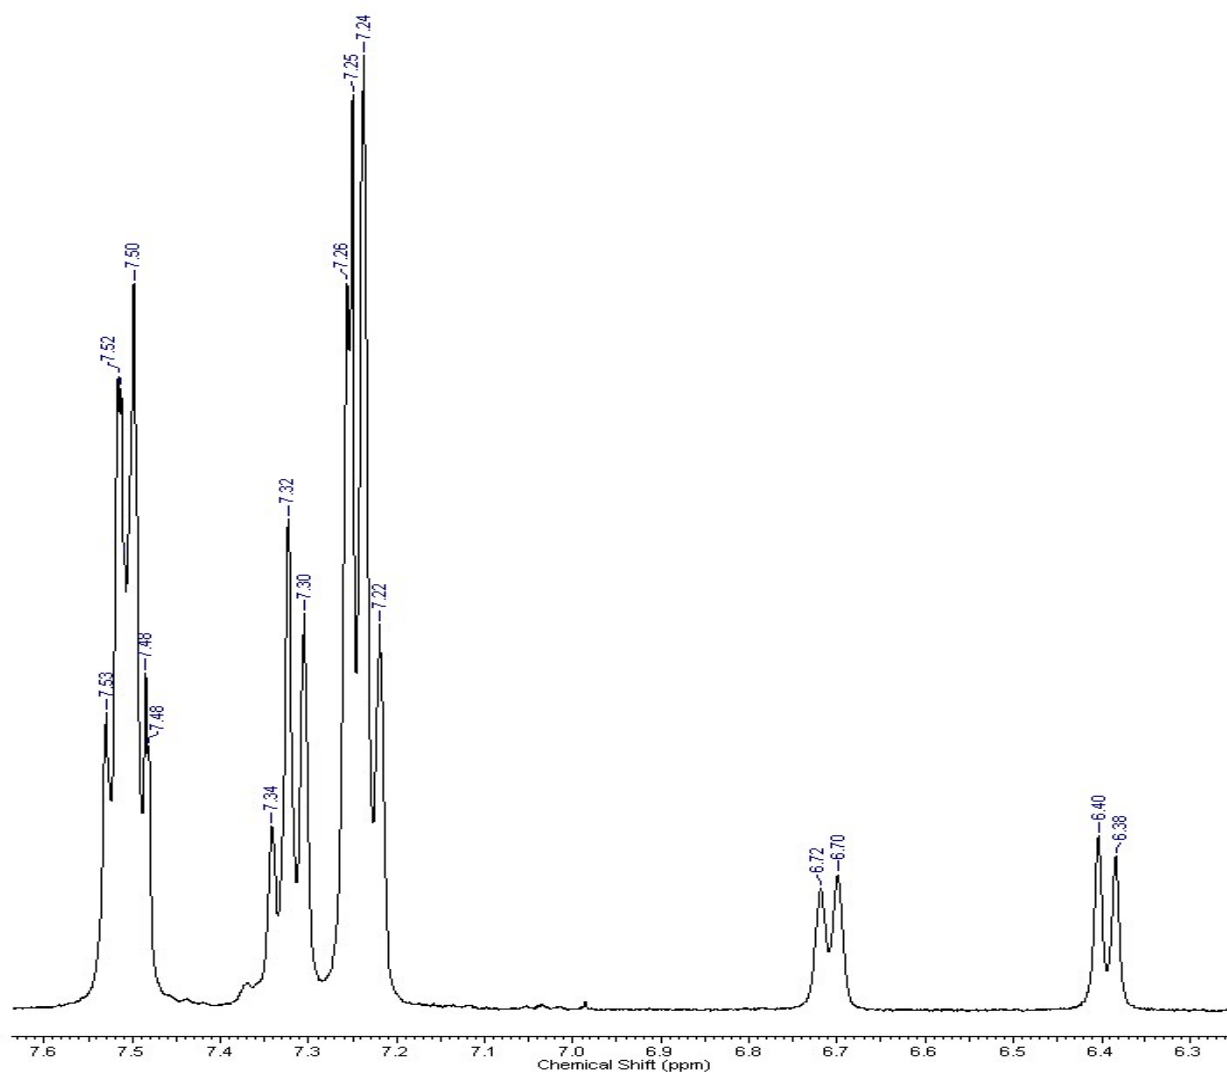

**Figure S3.**  $^1\text{H}$  NMR spectrum of  $(p\text{-CF}_3\text{C}_6\text{H}_4)\text{Pd}(\text{PPh}_3)_2\text{I}$  ( $\text{CDCl}_3$ ).

**Table S2** The influence of  $\text{Pd}(\text{dba})_2/p\text{-NO}_2\text{C}_6\text{H}_4\text{N}_2^+\text{BF}_4^-$  molar ratio on the yield and the molecular weight of polynorbornene (molar ratio of NB/Pd = 1000/1;  $[\text{NB}] = 2 \text{ M}$ ; the solvent – chloroform, the reaction time – 25 min, the reaction temperature –  $25^\circ\text{C}$ , in air).

| $\text{Pd}(\text{dba})_2/p\text{-NO}_2\text{C}_6\text{H}_4\text{N}_2^+\text{BF}_4^-$ | Yield, %        | $M_w \times 10^{-3}$ | $M_n \times 10^{-3}$ | $M_w/M_n$ |
|--------------------------------------------------------------------------------------|-----------------|----------------------|----------------------|-----------|
| 1/1                                                                                  | 86              | 58                   | 42                   | 1.4       |
| 1/3                                                                                  | 87              | 59                   | 43                   | 1.4       |
| 1/3                                                                                  | 65 <sup>a</sup> | 44                   | 26                   | 1.7       |
| 1/3                                                                                  | 60 <sup>b</sup> | 55                   | 31                   | 1.8       |
| 1/5                                                                                  | 90              | 47                   | 32                   | 1.5       |

<sup>a</sup>The reaction time was 15 min; the solvent was dry chloroform.

<sup>b</sup>The reaction time was 15 min; the solvent was reagent grade chloroform.



**Table S3** The influence of solvent nature on the polynorbornene yield (catalyst - Pd(dba)<sub>2</sub>/*p*-NO<sub>2</sub>C<sub>6</sub>H<sub>4</sub>N<sub>2</sub><sup>+</sup>BF<sub>4</sub><sup>-</sup>; molar ratio of Pd(dba)<sub>2</sub>/*p*-NO<sub>2</sub>C<sub>6</sub>H<sub>4</sub>N<sub>2</sub><sup>+</sup>BF<sub>4</sub><sup>-</sup> = 1/3; NB/Pd molar ratio = 2000/1; [NB] = 2 M; the solvent – chloroform, the reaction time – 2 h, in air).

| Solvent            | Yield, % | M <sub>w</sub> × 10 <sup>-3</sup> | M <sub>n</sub> × 10 <sup>-3</sup> | M <sub>w</sub> /M <sub>n</sub> |
|--------------------|----------|-----------------------------------|-----------------------------------|--------------------------------|
| Toluene            | 2        | 3.7                               | 1.9                               | 2.0                            |
| 1,2-Dichloroethane | 9        | 23                                | 18                                | 1.3                            |

**Table S4** The influence of temperature on the polynorbornene yield (catalyst - Pd(dba)<sub>2</sub>/*p*-NO<sub>2</sub>C<sub>6</sub>H<sub>4</sub>N<sub>2</sub><sup>+</sup>BF<sub>4</sub><sup>-</sup>; molar ratio of Pd(dba)<sub>2</sub>/*p*-NO<sub>2</sub>C<sub>6</sub>H<sub>4</sub>N<sub>2</sub><sup>+</sup>BF<sub>4</sub><sup>-</sup> = 1/3; NB/Pd molar ratio = 3000/1; [NB] = 2 M; the solvent – chloroform, the reaction time – 2 h, in air).

| Reaction temperature, °C | Yield, % | M <sub>w</sub> × 10 <sup>-3</sup> | M <sub>n</sub> × 10 <sup>-3</sup> | M <sub>w</sub> /M <sub>n</sub> |
|--------------------------|----------|-----------------------------------|-----------------------------------|--------------------------------|
| 25                       | 44       | 62                                | 48                                | 1.3                            |
| 45                       | 7        | 41                                | 5.7                               | 7.2                            |
| 60                       | 3        | 33                                | 6.6                               | 5.0                            |

### Crystallographic data

Crystals of (*p*-CF<sub>3</sub>C<sub>6</sub>H<sub>4</sub>)Pd(PPh<sub>3</sub>)<sub>2</sub>I (C<sub>43</sub>H<sub>34</sub>F<sub>3</sub>IP<sub>2</sub>Pd, M = 902.94) are monoclinic, space group C2/c, at 120 K: a = 25.1867(15), b = 13.4727(8), c = 11.4702(7) Å, β = 111.6700(10)°, V = 3617.1(4) Å<sup>3</sup>, Z = 4, d<sub>calc</sub> = 1.658 g\*cm<sup>-3</sup>, μ (MoKα) = 15.02 cm<sup>-1</sup>, F(000) = 1792. Intensities of 23605 reflections were measured with a Bruker APEX2 DUO CCD diffractometer [μ (MoKα) = 0.71073 Å<sup>-1</sup>, ω-scans, 2θ < 60°]; 5526 independent reflections [Rint 0.0772] were used in further refinement. Using Olex2,<sup>9</sup> the structure was solved with the ShelXT<sup>10</sup> structure solution program using Intrinsic Phasing and refined with the XL<sup>10</sup> refinement package using Least-Squares minimization. Positions of hydrogen atoms were calculated and they were refined in the isotropic approximation within the riding model. The refinement converged to wR2 = 0.0862 and GOF = 1.006 for all the independent reflections (R1 = 0.0390 was calculated against F for 4028 observed reflections with I > 2σ (I)). CCDC 2068310 contains the supplementary crystallographic information for (*p*-CF<sub>3</sub>C<sub>6</sub>H<sub>4</sub>)Pd(PPh<sub>3</sub>)<sub>2</sub>I.

### References

1. R. Patouret and T. M. Kamenecka, *Tetrahedron Lett.*, 2016, **57**, 1597-1599.
2. V. D. Filimonov, E. A. Krasnokutskaya, A. Z. Kassanova, V. A. Fedorova, K. S. Stankevich, N. G. Naumov, A. A. Bondarev and V. A. Kataeva, *Eur. J. Org. Chem.*, 2019, **2019**, 665-674.
3. D. E. Frantz, D. G. Weaver, J. P. Carey, M. H. Kress and U. H. Dolling, *Org. Lett.*, 2002, **4**, 4717-4718.
4. S. S. Zaleskiy and V. P. Ananikov, *Organometallics*, 2012, **31**, 2302-2309.

5. in *Inorg. Synth.*, 1972, DOI: <https://doi.org/10.1002/9780470132449.ch23>, pp. 121-124.
6. S. Fantasia and S. P. Nolan, *Chem. Eur. J.*, 2008, **14**, 6987-6993.
7. K. Müller, S. Kreiling, K. Dehnicke, J. Allgaier, D. Richter, L. J. Fetters, Y. Jung, D. Y. Yoon and A. Greiner, *Macromol. Chem. Phys.*, 2006, **207**, 193-200.
8. U. Okoroanyanwu, T. Shimokawa, J. D. Byers and C. G. Willson, *J. Mol. Catal. A: Chem.*, 1998, **133**, 93-114.
9. O. V. Dolomanov, L. J. Bourhis, R. J. Gildea, J. A. K. Howard and H. Puschmann, *J. Appl. Crystallogr.*, 2009, **42**, 339-341.
10. G. Sheldrick, *Acta Crystallographica Section A*, 2015, **71**, 3-8.
